# Prediction of Pediatric No-Show Rates Before and During the COVID-19 Pandemic Utilizing Machine Learning

1 Quincy A. Hathaway, MD, PhD<sup>1,2</sup>, Naveena Yanamala, PhD<sup>3</sup>, , TaraChandra Narumanchi, MD<sup>1,5</sup>,  
2 \*Janani Narumanchi, MD<sup>1,4</sup>

3

4 <sup>1</sup>Aspirations LLC, Morgantown, WV, USA

5 <sup>2</sup>Penn Medicine, University of Pennsylvania Health System, PA, USA

6 <sup>3</sup>Rutgers Robert Wood Johnson Medical School, New Brunswick, NJ, USA

7 <sup>4</sup>University of Tennessee, Le Bonheur Children's Hospital, Memphis, TN, USA

8 <sup>5</sup>Chicagi LLC, Ste R 10 N Gould street, Sheridan, WY, USA

9

## 10 \*Correspondence:

11 Associate Professor,  
12 University of Tennessee Health Science Center,  
13 Le Bonheur Children's Hospital  
14 51 N. Dunlap St., 3rd Floor  
15 Memphis, TN 38105 jnaruman@uthsc.edu

16

17 **Word Count:** Less than 12,000

18

19 **Keywords:** (Min.5-Max. 8)

20 **Abstract**

21 **Background:** Patient no-shows significantly disrupt pediatric healthcare delivery, highlighting the  
22 necessity for precise predictive models, especially during the dynamic shifts caused by the SARS-  
23 CoV-2 pandemic. In outpatient settings, these no-shows result in medical resource underutilization,  
24 increased healthcare costs, reduced access to care, and lower clinic efficiency and productivity.

25 **Methods:** The objective is to develop a predictive model for patient no-shows using data-driven  
26 techniques. We analyzed five years of historical data retrieved from both a scheduling system and  
27 electronic health records from a general pediatrics clinic within the WVU Health systems. This  
28 dataset comprises a total of 209,408 visits from 2015 to 2018, 82,925 visits in 2019, and 58,820 visits  
29 in 2020, spanning both pre-pandemic and pandemic periods. The data includes variables such as  
30 patient demographics, appointment details, timing, hospital characteristics, appointment types, and  
31 environmental factors.

32 **Results:** Our XGBoost model demonstrated robust predictive capabilities, notably outperforming  
33 traditional "no-show rate" metrics. Precision and recall metrics for all features were 0.82 and 0.88,  
34 respectively. Receiver Operator Characteristic (ROC) analysis yielded AUCs of 0.90 for all features  
35 and 0.88 for the top 5 predictors when evaluated on the 2019 cohort. Furthermore, model  
36 generalization across racial/ethnic groups was also observed. Evaluation on 2020 telehealth data  
37 reaffirmed model efficacy (AUC: 0.90), with consistent top predictive features.

38 **Conclusions:** Our study presents a sophisticated predictive model for pediatric no-show rates,  
39 offering insights into nuanced factors influencing attendance behavior. The model's adaptability to  
40 evolving healthcare landscapes, including telehealth, underscores its potential for enhancing clinical  
41 practice and resource allocation.

## 42 **Introduction**

43 Patient no-shows, defined as a patient failing to attend a scheduled appointment without prior  
44 notification, vary widely across healthcare settings, ranging from 12% to 80% (Marbough et al.,  
45 2020). No-shows are a major logistical and economic challenge for clinics and hospital systems,  
46 leading to significant revenue losses. No-shows cost the U.S. healthcare system more than \$150  
47 billion a year and individual physicians an average of \$200 per unused time slot (Gier, 2017).  
48 Whether patients show up or not, healthcare organizations and medical practices must still pay their  
49 staff and cover expenses of resources/facilities. For the provider, no-showed appointments decrease  
50 the volume of medical care that can be given. For patients, the increasing lengths of time needed to  
51 schedule follow-up appointments can be prohibitive of receiving proper care (Ansell et al., 2017).  
52 Patients who failed to keep an appointment were up to 70% more likely not to return within 18  
53 months, with older patients experiencing more chronic illnesses and more likely not to return to their  
54 physicians' offices after missing just one appointment (Hayhurst, 2019).

55 Several studies have modeled strategies for reducing patient wait times for clinic appointments  
56 through artificial intelligence (AI)-enabled technologies and solutions (Salazar et al., 2022). These  
57 machine and deep learning approaches have utilized random forest (Qureshi et al., 2021;Salazar et  
58 al., 2021), logistic regression (Moharram et al., 2021;Qureshi et al., 2021), gradient boosting  
59 (Daghistani et al., 2020;Fan et al., 2021), ensemble-based models (Ahmadi et al., 2019;Alshammari  
60 et al., 2021), deep neural networks (Alshammari et al., 2020;Srinivas and Salah, 2021), and various  
61 other approaches to predict patient no-shows. Studies have also examined the type of visit, whether  
62 primary care or specialty clinic, and varying demographic populations (e.g., United States, Saudi  
63 Arabia, Brazil, etc.) (Salazar et al., 2022). While outpatient scheduling with a healthcare provider is  
64 traditionally thought to be the largest percentage of no-showed appointments, the use of no-show  
65 algorithms could also predict patient readmissions (Shameer et al., 2017) and attrition from

66 diagnostic visits (i.e., imaging and laboratory studies) (Chong et al., 2020). These individualized  
67 approaches boost patient/provider satisfaction (Mohammadi et al., 2018) and allow for a more  
68 efficient model of healthcare.

69 The factors affecting patient no-shows can vary slightly between studied populations but can be  
70 generalized into three major categories: 1) modifiable and unmodifiable patient characteristics (e.g.,  
71 age, sex, race/ethnicity, BMI), 2) type of appointment scheduled (i.e. primary care or specialty  
72 clinic), and 3) patient behavior (e.g., previous no-show rate, time-to-appointment, travel distance,  
73 weather, etc.) (Salazar et al., 2022). Previous research indicates patients who miss appointments tend  
74 to be of lower socioeconomic status, often have a history of failed/no-show appointments,  
75 government-provided health benefits, and psychosocial problems who are less likely to understand  
76 the purpose of the appointment (Ellis et al., 2017;Daghistani et al., 2020;Marbouh et al., 2020). In  
77 addition to forgetting appointments, issues such as trouble getting off work, finding childcare,  
78 transportation, and cost can also limit patient compliance for an appointment. No-show rates also  
79 increase with increasing time between scheduling and the actual appointment (Festinger et al., 2002).  
80 In pediatrics, few studies have examined how no-show rates can be predicted using machine learning  
81 (Chen et al., 2020;Liu et al., 2022), with no pediatric studies exploring how the SARS-CoV-2  
82 pandemic affects the ability of no-show rates to handle virtual appointments.

83 Our study, assess the ability of a machine learning model to predict no-show rates in a pediatric  
84 population both before and during the SARS-CoV-2 pandemic. We utilized electronic medical record  
85 (EMR) data for patients, including features related to modifiable and unmodifiable patient  
86 characteristics, appointment type, and patient behavior. We build our model on pre-pandemic  
87 outpatient appointment data and utilized pre-pandemic and pandemic derived external validation sets.  
88 We were able to effectively predict pediatric no-show rates in our validation sets and further explored  
89 the role of race/ethnicity in no-show rate prediction.

## 90 **Methods**

### 91 *Ethical Approval*

92 The study was approved by West Virginia University Institutional Review Board.

93

### 94 *Study Population & Data Preprocessing*

95 Data from medical appointments were gathered from an outpatient clinic within a prominent  
96 academic pediatric hospital (West Virginia University Hospitals), aimed at enhancing quality  
97 improvement efforts. This dataset encompasses appointments across all clinic departments on main  
98 campus and satellite, outreach locations and visit types, including information on healthcare  
99 providers and weather/environmental conditions. To facilitate analysis, categorical data were  
100 transformed into multiple binary variables. For instance, the original "day of the week of the  
101 appointment" feature, ranging from 1 to 7 (representing Sunday to Saturday), was converted into  
102 seven binary indicators, each indicating the appointment's occurrence on a specific day. Numerical  
103 features were normalized to a range of 0 to 1. The labels indicating appointment outcomes were  
104 binary, with 1 indicating a no-show and 0 denoting attendance. Notably, a single patient may have  
105 multiple records due to multiple appointments. The patient demographic largely comprises children,  
106 often accompanied by their parents or caregivers to appointments.

107

### 108 *Machine Learning Algorithm Development*

109 Our current model leverages pediatric appointments from 2015-2018 (training/testing), 2019  
110 (validation), and 2020 (external holdout) that were scheduled at West Virginia University Outpatient  
111 Clinics under the West Virginia University Hospital Systems in Morgantown, West Virginia. The  
112 datasets consist of 209,408 (2015-2018), 82,925 (2019), and 58,820 (2020) patient appointments. A  
113 total of 46 features were collected that included demographic factors, time of appointment, hospital  
114 variables, type of appointment scheduled, and environmental conditions.

115 Our machine learning model relies on a XGBoost framework that allows for adaptable weighting of  
116 variables and hyperparameter optimization [30]. To predict patient no-shows, we implemented the  
117 XGBoost algorithm using the XGBClassifier, chosen for its robust performance on complex datasets.  
118 The classifier was configured with a gradient boosting 'gbtree' booster and a base score of 0.5. We set  
119 the learning rate to 0.3 and the maximum depth of trees to 6, ensuring the model was sufficiently  
120 detailed yet avoided overfitting. Each tree node considered all features due to a subsample rate and  
121 colsample parameters set to 1. The model utilized 100 estimators, with the optimization objective set  
122 to binary logistic, tailored for binary classification tasks.

123 For regularization, which helps reduce model complexity and enhance performance, we used  
124 a lambda value of 1 and an alpha value of 0. Handling missing values automatically, the model  
125 treated missing data points as NaNs, allowing for flexibility in dealing with incomplete records. The  
126 model operated under a binary logistic objective, focusing on the probability of no-show events. A  
127 total of four parallel jobs were run (*n\_jobs* set to 4), exploiting multi-core processing to expedite  
128 computation. The random state was anchored at 0 to ensure consistency and reproducibility across  
129 model runs. We employed an automatic predictor setting, which optimally selected the most efficient  
130 prediction method based on the data structure. The tuning of hyperparameters like *max\_depth*,  
131 *min\_child\_weight*, *subsample*, and *colsample\_bytree* was conducted through a methodical grid  
132 search to identify the optimal balance, enhancing model effectiveness without overfitting. This  
133 methodological approach was geared towards developing a robust predictive model that could  
134 effectively forecast patient no-show probabilities in pediatric outpatient settings, considering various  
135 patient and environmental factors.

136

### 137 *Performance Evaluation Metrics*

138 The model's performance was evaluated using standard metrics: accuracy, precision, recall, and area  
139 under the ROC curve (AUROC). The ROC curve plots the true positive rate (sensitivity) against the

140 false positive rate (1-specificity) at different thresholds ranging from 0 to 1. The prediction scores  
141 (i.e., the predicted probabilities of no-shows) are compared at each threshold. A higher AUROC  
142 value (closer to 1) indicates better prediction quality. Similarly, the precision-recall curve (PRC) and  
143 area under the PRC (AUPRC) were calculated. Precision measures the accuracy of positive  
144 predictions, while recall measures the model's ability to identify all actual positives. These metrics  
145 collectively provide insights into the model's predictive accuracy and effectiveness.

146

#### 147 *SHAP Feature Analysis*

148 We employed SHAP (SHapley Additive exPlanations) feature analysis to interpret the predictive  
149 model's behavior and understand the importance of each feature in making predictions. SHAP values  
150 provide insights into how individual features contribute to the model's output. By decomposing the  
151 model's output for each prediction, SHAP enables us to understand the impact of each feature on the  
152 prediction outcome. Particularly, SHAP summary plots was generated to visualize the overall feature  
153 importance and understand the relationship between specific features and the predicted outcome.  
154 Positive SHAP values indicate a feature that contributes to increasing the prediction, while negative  
155 values suggest a feature that decreases the prediction.

156

#### 157 *Intellectual Property/Data Availability*

158 Our machine learning algorithm is covered by a provisional patent filed between Aspirations LLC  
159 and West Virginia University. This is distinctly unique from other filed patents, including  
160 US0150242819A1 [2015] – utilizing advanced statistical techniques with no indication of accuracy  
161 or performance of the models. US20110208674A1 [2010] – a similar concept but within a ticket  
162 booking system. WO2018058189A1 [2016] – describes a supervised learning module that targets  
163 overbooking strategies, rather than uniquely identifying patients who are at risk of no-showing their

164 appointment. Due to confidentiality agreements and the proprietary nature of the technology, the  
165 underlying data supporting this work is not publicly available.

166

### 167 *Statistics*

168 Baseline characteristics of the dataset were analyzed to provide insights into the demographic, clinic-  
169 based, insurance and appointment-related attributes of the patient population. Descriptive statistics,  
170 including measures of central tendency and dispersion, were computed for numerical variables such  
171 as age and appointment duration etc. Categorical variables, such as gender and appointment type,  
172 were summarized using frequency distributions.

173 To identify factors influencing the likelihood of patient no-shows, univariate and multivariate  
174 analyses were conducted. Univariate analyses involved assessing the association between each  
175 individual predictor variable and the outcome variable (completed vs. show) using appropriate  
176 statistical tests such as chi-square tests for categorical variables and t-tests or ANOVA for continuous  
177 variables.

178

## 179 **Results**

### 180 **Baseline Characteristics and Influence of Variables on No-show Rates.**

181 We retrospectively collected records from 161,822 hospital appointments made by 19,450 patients  
182 between January 1<sup>st</sup>, 2015 and December 31<sup>st</sup>, 2019 at pediatric clinics of all specialties in West  
183 Virginia University Hospitals [WVUH]. From our experience the main factors driving the no-show  
184 rate were the days until the scheduled appointments. The longer the interval, the less likelihood of the  
185 appointment being completed. We also noted that same day appointments had low likelihood of  
186 patient no-shows. If the appointment was canceled or rescheduled that was another important  
187 predictive factor resulting in the no-shows. Interestingly full-time employment status of the parent  
188 had a positive impact on the adherence to the appointment in our pediatric clinics. Thos with



189 previous history of no-shows tend to have more chances of missing future appointments. Though it  
190 was not a major factor? but we noted that some pediatric specialties had higher chances of  
191 completing appointments for example Cardiology, Nephrology while others had higher chances of  
192 experiencing patient no-shows for example Hematology, Neurology, Gastroenterology.

193 Gender, weather, race or ethnicity, language preference were not significantly impacting the status of  
194 a no-show for a scheduled appointment.

195

### 196 **Performance of model predictions of no-shows**

197 The machine learning model developed the no-show prediction probabilities. Table 2  
198 highlights the superior prediction capacity of patient no-shows when using all 46 features collected  
199 (Precision: 0.82, Recall: 0.88) as well as the top 5 predictive features (Precision: 0.81, Recall: 0.84)  
200 in the validation dataset. This is further captured by the Receiver Operator Characteristic (ROC) Area  
201 Under the Curve (AUC) for all features (AUC: 0.90) and top 5 features (AUC: 0.88) (Figure 1).  
202 Additionally, we used the basic “no-show rate” alone to compute the likelihood of a patient being  
203 compliant with their visit (AUC: 0.64) (Figure 1). This “no-show rate” is a simple frequency: (total  
204 visits the patient has no-showed) / (total visits the patient has attended + total visits the patient has  
205 no-showed). This frequency is commonly employed by EMR systems to provide a baseline  
206 estimation if double booking or other alternative scheduling procedures should be enacted. To test if  
207 our algorithm can provide unbiased predictions across racial/ethnic groups, we subset the data. While  
208 Caucasians make up the primary patient population, our algorithm can efficiently generalize to other  
209 racial and ethnic populations, even when underrepresented (Table 3). From our analyses in the  
210 pediatric population, the no-show rate alone was insufficient to effectively predict patient compliance  
211 with their appointment. Additionally, features that were most important to the construction of the  
212 model were not within a single category, highlighting the complexity in interpreting of patient no-

213 shows (Figure 2). The top five most predictive features extended across demographic factors, time of  
214 the appointment, hospital variables, and type of appointment.

215

### 216 **Evaluation of Model Generalizability and Adaptability to unknown Healthcare Needs**

217 We also wanted to understand if our model was adaptable to the changing dynamics of  
218 healthcare needs and initiatives, such as those driven by the Coronavirus Disease 2019 (COVID-19),  
219 which created an increase of no-contact telehealth appointments. The evaluation of our holdout  
220 dataset (2020), which contained 35% telehealth visits, revealed that our model provided superior  
221 predictions across all features (AUC: 0.90) and the topmost predictive features (AUC: 0.88) (Figure  
222 3). Again, we showed that the traditional “no-show rate” computed in the EMR system was  
223 significantly inferior to our integrative approach (AUC: 0.62). We further evaluated the top 5 features  
224 in the model, which revealed the same features as seen in the validation dataset (i.e., Demographics-  
225 8, Time-3, Hospital-5, Appointment-11, and Appointment-10) (Data Not Shown). Model robustness  
226 on the 2020 pediatric telemedicine dataset and the shared top features between the validation and  
227 external holdout dataset highlight the persistence of our machine learning model to generate accurate  
228 predictions of patient no-shows. Additionally, the preliminary data is from pediatric appointments,  
229 highlighting our algorithm’s ability to predict the no-show rate of the patient based primarily on  
230 external factors, such as transportation by the guardian/caregiver.

231

232 For our system at WVU, we learned that strategic double booking might be a solution. Most of our  
233 clinics had 20 minutes visit slots, so for a 4 hours clinic session, our proposed double booking was  
234 focused towards the middle of the session with a limit of 2 per 4 hours and 3 for 8 hours. Some of our  
235 specialists had 30 minutes for a return visit and 1 hour for a new patient visit. For those schedules our  
236 strategy was to overbook a follow up visit in the new patient visit slot with a new patient who had  
237 waited over 3 months for the appointment as the data suggested decreased probability of patient

238 adherence to a scheduled appointment after 3 months wait time. We strongly recommended not  
239 overbooking at the beginning or end of a clinic session to maintain the flow of the clinic as well as  
240 considering the providers efficiency during the clinic session. As the technology improves all these  
241 measures might even become second nature in clinic patient scheduling.

## 242 **Discussion**

243 Our technology uses an AI-based machine-learning algorithm to predict the probability of  
244 individual patients not showing to an appointment on a given date and time. The algorithm uses a  
245 patient's historical demographic data to proactively predict no-shows and employ strategic double  
246 booking to avoid disruptions and minimize costs to the clinic. Unlike other scheduling systems that  
247 employ advanced statistical techniques (such as logistic regression and Bayesian prediction), our  
248 platform leverages cutting-edge machine learning technology -- a scalable, distributed gradient-  
249 boosted decision tree algorithm utilizing minimal feature input for easy implementation across all  
250 healthcare systems -- that continues to learn and improve, thus increasing prediction accuracy over  
251 time.

252 Of the work that has been done to improve patient no-show prediction, many studies have  
253 failed to perform superiorly to the basic statistic of no-show rate displayed per patient [17]. Of the  
254 studies that performed better than the no-show rate basic statistic, most algorithms have not shown  
255 superior performance in predicting patient no-shows (i.e., AUC <0.85) and have also only been  
256 applied to very specific populations (i.e., a single population or visit type) [17]. While the current  
257 algorithms predicting patient no-shows reveal promise for clinical application [27, 28], there is  
258 currently no validated machine learning algorithm incorporated into an EMR to provide real-time  
259 predictions. Additionally, due to the limited scope of most no-show prediction algorithms, racial bias  
260 within the algorithm can result in up to a 30% increase in wait time for black patients [29];

261 optimizing care for patients, regardless of gender, race/ethnicity, and socioeconomic status, requires a  
262 demonstration of the algorithms stability across these conditions to promote healthcare equity.

263

264 Clinics currently utilize scheduling protocols that dictate how patients get scheduled for each  
265 clinic and within different specialties. There's considerable variability per provider, per clinic, and  
266 sometimes even per site within a healthcare system. Epic Systems Corporation (Epic) Electronic  
267 Medical Record (EMR) has a basic statistic that displays the no-show rate per patient in the  
268 scheduling software, but there is little knowledge about the prospective performance of this  
269 information. However, this information is not currently utilized in improving the scheduling of  
270 appointments.

271 While the scheduling staff can see the historic no-show rate for each patient when they call  
272 for an appointment, they have no autonomy to actively modify scheduling to reduce patient no-shows  
273 and follow the guidance of clinic protocols. As such, commonly implemented approaches to avoid  
274 no-shows include appointment reminders and no-show fines, while approaches to reduce the impact  
275 of no-shows on the providers and the healthcare system include double booking. Double booking  
276 could offer an advantage to both the patient and provider if implemented in a strategic manner,  
277 including through combination with predictive AI algorithms. However, such automated "strategic  
278 double booking" would require a machine-learning algorithm capable of dynamically updating based  
279 on each patient's likelihood of missing an appointment. For example, at WVU, strategic double  
280 booking was observed to be an effective approach. In clinics with 20-minute visit slots, double  
281 booking was typically concentrated in the middle of 4-hour sessions, with a common limit of two  
282 patients for a 4-hour session and three for an 8-hour session. For specialists with 30-minute return  
283 visits and 1-hour new patient appointments, follow-up visit slots were often overbooked with new  
284 patients who had been waiting over 3 months, as data suggested a decrease in adherence following  
285 such delays. Additionally, overbooking at the start or end of clinic sessions was generally avoided to

286 maintain clinic flow and optimize provider efficiency. As the technology improves all these measures  
287 might even become second nature in clinic patient scheduling. Thus, there is an unmet need for  
288 generalizable machine-learning approaches to both predict and proactively address patient no-shows  
289 and their impact on the healthcare system.

## 290 **Limitations**

291 Our study looked at the clinic population in the Appalachian region of west Virginia. Even though  
292 there was financial diversity within the state was taken into consideration, there might be factors that  
293 were not obvious in our results due to limited ethnic and racial diversity in the state of West Virginia.  
294 While our study provides valuable insights, it is important to acknowledge limitations such as  
295 potential data biases and the retrospective nature of the analysis. Importantly, the data used in this  
296 study are provided by a specific hospital or hospital system, and in pediatric population thus the  
297 generalizability of the research results may be limited. Future research can extend the data source to  
298 other hospitals and to other population and age ranges to cross-validate our results or could focus on  
299 prospectively collecting data and implementing interventions to evaluate their effectiveness in  
300 reducing patient no-show rates.

301 Our proposed solution of strategic overbooking, itself, has its limitation. It depends on the protocols  
302 shared with the call center to offer certain slots for overbooking. We believe that a model actively  
303 analyzing the patient no-show data and proposing slots in real time using the patient no-show history  
304 might be a better solution to take away any end user bias or human errors in interpreting the protocol  
305 implementation.

306

## 307 **Conclusions**

308 No-shows in healthcare settings pose significant challenges for both providers and patients.  
309 Understanding the underlying factors driving these no-shows is crucial for developing effective

310 interventions to reduce their occurrence and enhance clinic efficiency. This study proposes the  
311 implementation of a machine learning framework to predict patient no-shows, offering hospitals a  
312 proactive approach to optimize their outpatient appointment systems. By accurately anticipating  
313 potential no-show behavior, healthcare facilities can implement targeted strategies such as  
314 personalized appointment reminders, flexible scheduling options, and provider-specific interventions  
315 to mitigate the impact of no-shows on healthcare delivery. These proactive measures not only  
316 improve clinic efficiency but also enhance patient satisfaction, provider productivity and overall  
317 healthcare outcomes.

318 **Conflict of Interest**

319 The authors declare that the research was conducted in the absence of any commercial or financial  
320 relationships that could be construed as a potential conflict of interest.

321 **Author Contributions**

322 JN, TC and NY contributed to conception and design of the study. NY organized the database. QH  
323 and NY performed the statistical analysis and developed models. QH wrote the first draft of the  
324 manuscript. JN, TC, and NY wrote sections of the manuscript. All authors contributed to manuscript  
325 revision, read, and approved the submitted version.

326 **Funding**

327 N/A

328 **Data Availability**

329 All data produced in the present study are available upon reasonable request to the authors.

330

331 **Acknowledgments**

332 The authors express their gratitude to all the patients, providers, administrators, clinic staff,  
333 schedulers and researchers at West Virginia University Hospitals who contributed and/or supported  
334 our research.

335

336

## 337 **References**

- 338 Ahmadi, E., Garcia-Arce, A., Masel, D.T., Reich, E., Puckey, J., and Maff, R. (2019). A  
339 metaheuristic-based stacking model for predicting the risk of patient no-show and late  
340 cancellation for neurology appointments. *IISE Transactions on Healthcare Systems*  
341 *Engineering* 9, 272-291.
- 342 Alshammari, A., Almalki, R., and Alshammari, R. (2021). Developing a Predictive Model of  
343 Predicting Appointment No-Show by Using Machine Learning Algorithms. *Journal of*  
344 *Advances in Information Technology* 12, 234-239.
- 345 Alshammari, R., Daghistani, T., and Alshammari, A. (2020). The Prediction of Outpatient No-Show  
346 Visits by using Deep Neural Network from Large Data. (*IJACSA*) *International Journal of*  
347 *Advanced Computer Science and Applications* 11, 533-539.
- 348 Ansell, D., Crispo, J.a.G., Simard, B., and Bjerre, L.M. (2017). Interventions to reduce wait times for  
349 primary care appointments: a systematic review. *BMC Health Serv Res* 17, 295.
- 350 Chen, J., Goldstein, I.H., Lin, W.C., Chiang, M.F., and Hribar, M.R. (2020). Application of Machine  
351 Learning to Predict Patient No-Shows in an Academic Pediatric Ophthalmology Clinic. *AMIA*  
352 *Annu Symp Proc* 2020, 293-302.
- 353 Chong, L.R., Tsai, K.T., Lee, L.L., Foo, S.G., and Chang, P.C. (2020). Artificial Intelligence  
354 Predictive Analytics in the Management of Outpatient MRI Appointment No-Shows. *AJR Am*  
355 *J Roentgenol* 215, 1155-1162.
- 356 Daghistani, T., Alghamdi, H., Alshammari, R., and Alhazme, R.H. (2020). Predictors of outpatients'  
357 no-show: big data analytics using apache spark. *Journal of Big Data* 7.
- 358 Ellis, D.A., Mcqueenie, R., Mcconnachie, A., Wilson, P., and Williamson, A.E. (2017).  
359 Demographic and practice factors predicting repeated non-attendance in primary care: a  
360 national retrospective cohort analysis. *Lancet Public Health* 2, e551-e559.
- 361 Fan, G., Deng, Z., Ye, Q., and Wang, B. (2021). Machine learning-based prediction models for  
362 patients no-show in online outpatient appointments. *Data Science and Management* 2, 45-52.
- 363 Festinger, D.S., Lamb, R.J., Marlowe, D.B., and Kirby, K.C. (2002). From telephone to office: intake  
364 attendance as a function of appointment delay. *Addict Behav* 27, 131-137.
- 365 Gier, J. (2017). *Missed appointments cost the U.S. healthcare system \$150B each year* [Online].  
366 Online: Healthcare Innovation. Available: [https://www.hcinnovationgroup.com/clinical-](https://www.hcinnovationgroup.com/clinical-it/article/13008175/missed-appointments-cost-the-us-healthcare-system-150b-each-year)  
367 [it/article/13008175/missed-appointments-cost-the-us-healthcare-system-150b-each-year](https://www.hcinnovationgroup.com/clinical-it/article/13008175/missed-appointments-cost-the-us-healthcare-system-150b-each-year)  
368 [Accessed 2023].
- 369 Hayhurst, C. (2019). *No-show effect: Even one missed appointment risks retention* [Online]. Online:  
370 Athenahealth. Available: [https://www.athenahealth.com/knowledge-hub/financial-](https://www.athenahealth.com/knowledge-hub/financial-performance/no-show-effect-even-one-missed-appointment-risks-retention)  
371 [performance/no-show-effect-even-one-missed-appointment-risks-retention](https://www.athenahealth.com/knowledge-hub/financial-performance/no-show-effect-even-one-missed-appointment-risks-retention) [Accessed 2023].
- 372 Liu, D., Shin, W.Y., Sprecher, E., Conroy, K., Santiago, O., Wachtel, G., and Santillana, M. (2022).  
373 Machine learning approaches to predicting no-shows in pediatric medical appointment. *NPJ*  
374 *Digit Med* 5, 50.
- 375 Marbough, D., Khaleel, I., Al Shanqiti, K., Al Tamimi, M., Simsekler, M.C.E., Ellahham, S.,  
376 Alibazoglu, D., and Alibazoglu, H. (2020). Evaluating the Impact of Patient No-Shows on  
377 Service Quality. *Risk Manag Healthc Policy* 13, 509-517.



- 378 Mohammadi, I., Wu, H., Turkcan, A., Toscos, T., and Doebbeling, B.N. (2018). Data Analytics and  
379 Modeling for Appointment No-show in Community Health Centers. *J Prim Care Community*  
380 *Health* 9, 2150132718811692.
- 381 Moharram, A., Altamimi, S., and Alshammari, R. (2021). "Data Analytics and Predictive Modeling  
382 for Appointments No-show at a Tertiary Care Hospital", in: *2021 1st International*  
383 *Conference on Artificial Intelligence and Data Analytics (CAIDA)*. (Riyadh, Saudi Arabia).
- 384 Qureshi, Z., Maqbool, A., Mirza, A., Iqbal, M.Z., Afzal, F., Kanubala, D.D., Rana, T., Umair, M.Y.,  
385 Wakeel, A., and Shah, S.K. (2021). Efficient Prediction of Missed Clinical Appointment  
386 Using Machine Learning. *Comput Math Methods Med* 2021, 2376391.
- 387 Salazar, L.H.A., Leithardt, V.R.Q., Parreira, W.D., Fernandes, A.M.R., Barbosa, J.L.V., and Correia,  
388 S.D. (2021). Application of Machine Learning Techniques to Predict a Patient's No-Show in  
389 the Healthcare Sector. *Future Internet* 14, 3.
- 390 Salazar, L.H.A., Parreira, W.D., Fernandes, A.M.R., and Leithardt, V.R.Q. (2022). No-Show in  
391 Medical Appointments with Machine Learning Techniques: A Systematic Literature Review.  
392 *Information* 13, 507.
- 393 Shameer, K., Johnson, K.W., Yahi, A., Miotto, R., Li, L.I., Ricks, D., Jebakaran, J., Kovatch, P.,  
394 Sengupta, P.P., Gelijns, S., Moskovitz, A., Darrow, B., David, D.L., Kasarskis, A., Tatonetti,  
395 N.P., Pinney, S., and Dudley, J.T. (2017). Predictive Modeling of Hospital Readmission Rates  
396 Using Electronic Medical Record-Wide Machine Learning: A Case-Study Using Mount Sinai  
397 Heart Failure Cohort. *Pac Symp Biocomput* 22, 276-287.
- 398 Srinivas, S., and Salah, H. (2021). Consultation length and no-show prediction for improving  
399 appointment scheduling efficiency at a cardiology clinic: A data analytics approach.  
400 *International Journal of Medical Informatics* 145.

401  
402

403 **Tables**

404

405 **Table 1:** Details of the Study Population and influence of the variables across the show and no-show

406 appointments.

| Parameter                               | Completed Appointment<br>[95% CI] (n=116,442) | Not Completed Appointment<br>[95% CI] (n=93,202) | P-Value | Cohen (Effect Size) |
|-----------------------------------------|-----------------------------------------------|--------------------------------------------------|---------|---------------------|
| <b>Patient's Age (years)</b>            | 11.56 [11.49-11.62]                           | 11.27 [11.2-11.33]                               | <0.001  | 0.0267              |
| <b>Gender (% Male)</b>                  | 61478 (52.80%)                                | 48409 (51.94%)                                   | <0.001  | 0.0172              |
| <b>Race Ethnicity (% Caucasian)</b>     | 108668 (93.32%)                               | 86103 (92.38%)                                   | <0.001  | 0.0377              |
| <b>English Fluency (% Fluent)</b>       | 114644 (98.46%)                               | 91307 (97.97%)                                   | <0.001  | 0.0397              |
| <b>Department</b>                       |                                               |                                                  |         |                     |
| Allergy/Immunology                      | 12811 (11.00%)                                | 9643 (10.35%)                                    | <0.001  | 0.021               |
| Cardiology                              | 18532 (15.92%)                                | 10872 (11.66%)                                   | <0.001  | <b>0.1162*</b>      |
| Craniofacial Surgery                    | 694 (0.60%)                                   | 564 (0.61%)                                      | 0.7879  | 0.0012              |
| Cardiothoracic Surgery                  | 1881 (1.62%)                                  | 1239 (1.33%)                                     | <0.001  | 0.0227              |
| Dermatology                             | 1550 (1.33%)                                  | 1187 (1.27%)                                     | 0.2486  | 0.005               |
| Endocrinology                           | 12739 (10.94%)                                | 9290 (9.97%)                                     | <0.001  | 0.0312              |
| Gastroenterology                        | 10864 (9.33%)                                 | 11661 (12.51%)                                   | <0.001  | <b>0.1094*</b>      |
| Hematology/Oncology                     | 7350 (6.31%)                                  | 3342 (3.59%)                                     | <0.001  | <b>0.1121*</b>      |
| Infectious Diseases                     | 1125 (0.97%)                                  | 920 (0.99%)                                      | 0.6276  | 0.0021              |
| Neurology                               | 11847 (10.17%)                                | 13610 (14.60%)                                   | <0.001  | <b>0.1465*</b>      |
| Neonatology                             | 1329 (1.14%)                                  | 1366 (1.47%)                                     | <0.001  | 0.0305              |
| Neurosurgery                            | 4119 (3.54%)                                  | 3665 (3.93%)                                     | <0.001  | 0.0214              |
| Nephrology                              | 6152 (5.28%)                                  | 6946 (7.45%)                                     | <0.001  | 0.097               |
| Orthopedics                             | 13942 (11.97%)                                | 8209 (8.81%)                                     | <0.001  | 0.0975              |
| Plastic Surgery                         | 304 (0.26%)                                   | 225 (0.24%)                                      | 0.3725  | 0.0039              |
| Pulmonology                             | 1812 (1.56%)                                  | 2425 (2.60%)                                     | <0.001  | 0.0845              |
| Sports Medicine                         | 298 (0.26%)                                   | 153 (0.16%)                                      | <0.001  | 0.0182              |
| Surgery (General)                       | 3071 (2.64%)                                  | 1823 (1.96%)                                     | <0.001  | 0.0425              |
| Urology                                 | 17474 (15.01%)                                | 19321 (20.73%)                                   | <0.001  | <b>0.1603*</b>      |
| Other Departments                       | 395 (0.34%)                                   | 351 (0.38%)                                      | 0.1533  | 0.0064              |
| <b>Days Until Scheduled Appointment</b> | 48.06 [47.68-48.44]                           | 82.28 [81.74-82.82]                              | <0.001  | <b>0.5180*</b>      |
| <b>Appointment Length</b>               | 25.05 [24.98-25.11]                           | 26.45 [26.38-26.52]                              | <0.001  | <b>0.1251*</b>      |
| <b>Referral Required</b>                | 16837 (14.46%)                                | 14858 (15.94%)                                   | <0.001  | 0.0421              |
| <b>Overbooked Timeslot</b>              | 12302 (10.56%)                                | 5602 (6.01%)                                     | <0.001  | <b>0.1482*</b>      |
| <b>Same Day Appointment</b>             | 9926 (8.52%)                                  | 829 (0.89%)                                      | <0.001  | <b>0.2734*</b>      |
| <b>Canceled Appointment Ratio</b>       | 20.40% [20.29%-20.51%]                        | 29.07% [28.93%-29.22%]                           | <0.001  | <b>0.4544*</b>      |
| <b>No-Show Appointment Ratio</b>        | 3.65% [3.62%-3.69%]                           | 5.12% [5.07%-5.17%]                              | <0.001  | <b>0.2249*</b>      |
| <b>Guardian Gender (% Male)</b>         | 14325 (22.98%)                                | 7380 (19.86%)                                    | <0.001  | 0.0742              |
| <b>Employment Status</b>                |                                               |                                                  |         |                     |
| Full-Time                               | 58784 (50.48%)                                | 31562 (33.86%)                                   | <0.001  | <b>0.3324*</b>      |
| Part-Time                               | 7903 (6.79%)                                  | 4758 (5.11%)                                     | <0.001  | 0.0669              |
| Student                                 | 1814 (1.56%)                                  | 977 (1.05%)                                      | <0.001  | 0.0412              |
| Unemployed                              | 32678 (28.06%)                                | 23121 (24.81%)                                   | <0.001  | 0.0725              |
| <b>Insurance (% Medicaid)</b>           | 50497 (43.37%)                                | 35233 (37.80%)                                   | <0.001  | <b>0.1123*</b>      |
| <b>Copay Due at Visit</b>               | 8.07 [7.98-8.16]                              | 6.29 [6.2-6.38]                                  | <0.001  | <b>0.1146*</b>      |
| <b>Maximum Temperature</b>              | 65.23 [65.12-65.33]                           | 63.94 [63.82-64.06]                              | <0.001  | 0.0699              |
| <b>Minimum Temperature</b>              | 47.41 [47.31-47.51]                           | 46.35 [46.24-46.47]                              | <0.001  | 0.0615              |
| <b>Temperature</b>                      | 56.19 [56.09-56.29]                           | 55.03 [54.92-55.15]                              | <0.001  | 0.0673              |

|                                   |                     |                     |        |                |
|-----------------------------------|---------------------|---------------------|--------|----------------|
| <b>Wind Chill</b>                 | 27.32 [27.21-27.43] | 25.96 [25.83-26.09] | <0.001 | <b>0.1008*</b> |
| <b>Precipitation</b>              | 0.13 [0.13-0.13]    | 0.13 [0.13-0.13]    | 0.0235 | 0.01           |
| <b>Wind Speed</b>                 | 10.38 [10.36-10.4]  | 10.42 [10.4-10.44]  | 0.0057 | 0.0121         |
| <b>Cloud Cover</b>                | 52.53 [52.35-52.72] | 53.79 [53.59-54]    | <0.001 | 0.0395         |
| <b>Relative Humidity</b>          | 67.26 [67.19-67.34] | 67.45 [67.37-67.53] | 0.0011 | 0.0142         |
| <b>Weather - Clear</b>            | 29065 (24.96%)      | 22124 (23.74%)      | <0.001 | 0.0283         |
| <b>Weather - Rain</b>             | 56191 (48.26%)      | 45990 (49.34%)      | <0.001 | 0.0218         |
| <b>Weather - Overcast</b>         | 35816 (30.76%)      | 30136 (32.33%)      | <0.001 | 0.0341         |
| <b>Weather - Partially cloudy</b> | 51561 (44.28%)      | 40942 (43.93%)      | 0.1066 | 0.0071         |

407

408 **Table 2.** Model performance metrics on the 2019 validation data.

|                       | <b>Precision</b> | <b>Recall</b> | <b>F1-score</b> |
|-----------------------|------------------|---------------|-----------------|
| <b>All Features</b>   |                  |               |                 |
| <b>Negative Class</b> | 0.83             | 0.75          | 0.79            |
| <b>Positive Class</b> | 0.82             | 0.88          | 0.85            |
| <b>Accuracy</b>       |                  |               | 0.82            |
| <b>Top 5 Features</b> |                  |               |                 |
| <b>Negative Class</b> | 0.78             | 0.74          | 0.76            |
| <b>Positive Class</b> | 0.81             | 0.84          | 0.82            |
| <b>Accuracy</b>       |                  |               | 0.80            |

409

410 **Table 3.** Model training on the entire dataset followed by application and evaluation on individual  
 411 racial and ethnic groups.

| <b>Racial/Ethnic Group</b> | <b>2015-2018 (# of Patients and Total Percent)</b> | <b>2019 (# of Patients and ROC AUC)</b> | <b>2020 (# of Patients and ROC AUC)</b> |
|----------------------------|----------------------------------------------------|-----------------------------------------|-----------------------------------------|
| <b>Caucasian</b>           | 177, 375 (93%)                                     | 67,559 (AUC: 0.89)                      | 47,495 (AUC: 0.89)                      |
| <b>Black</b>               | 5,644 (3.0%)                                       | 1,999 (AUC: 0.84)                       | 1,466 (AUC: 0.83)                       |
| <b>Two or More Races</b>   | 4,570 (2.4%)                                       | 1,933 (AUC: 0.75)                       | 1,408 (AUC: 0.83)                       |
| <b>Hispanic/Latino</b>     | 2,386 (1.2%)                                       | 1,095 (AUC: 0.79)                       | 731 (AUC: 0.81)                         |
| <b>Asian American</b>      | 1,073 (0.6%)                                       | 568 (AUC: 0.83)                         | 372 (AUC: 0.85)                         |
| <b>Native American</b>     | 204 (0.1%)                                         | 69 (AUC: 0.84)                          | 84 (AUC: 0.78)                          |

412

413 **Figure Legends**

414 **Figure 1. Performance of the machine learning (XGBoost) model for predicting no-shows in the**  
415 **hold-out test set.** AUROC of xgboost machine learning model all features (blue line), only the top-5  
416 features (orange line) and the direct no-show/cancel rate (yellow line) in predicting no-shows for  
417 2019 hold-out validation dataset.

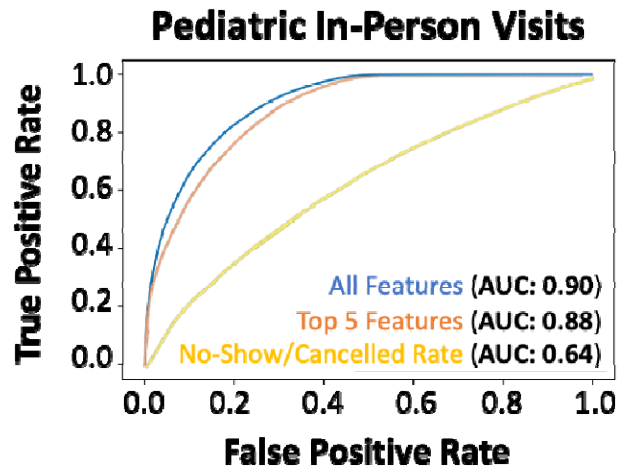

418

419

420 **Figure 2. Feature importance in predicting no-shows.** SHAP summary plot for the top 10 features  
421 contributing to the XGBoost model. Each line represents a feature, and the abscissa is the SHAP  
422 value. Red dots represent higher feature values, blue dots represent lower feature values and grey  
423 dots represent missing values.

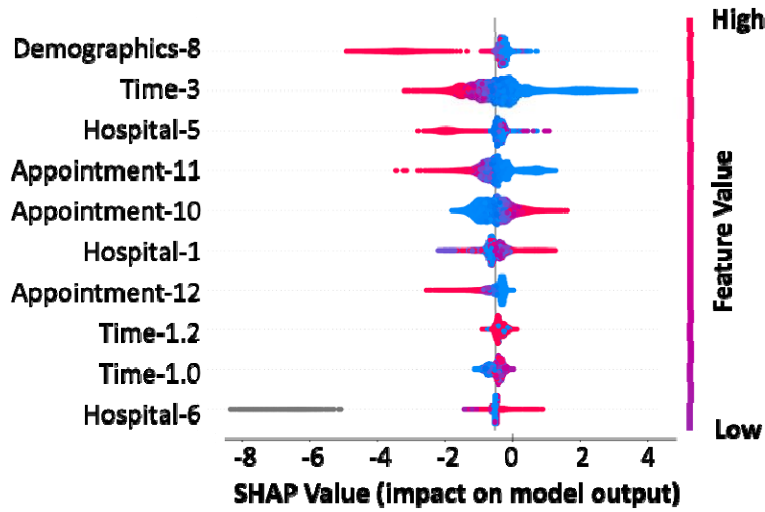

424

425

426

427 **Figure 3. Performance of the machine learning (XGBoost) model for predicting no-shows in the**  
428 **external validation dataset.** AUROC of xgboost machine learning model all features (blue line),  
429 only the top-5 features (orange line) and the direct no-show/cancel rate (yellow line) in predicting no-  
430 shows of the 2020 telemedicine dataset during the pandemic season.

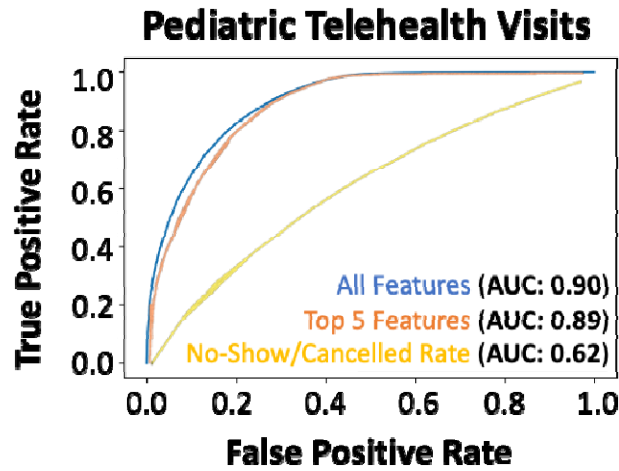

431

432
